# Supplementary material for: Metabolic Profiling in Plasma and Brain Induced by 17β-Estradiol Supplementation in Ovariectomized Mice
Source: PubMed Central journal article supplement — ACS Omega. 2024 Apr 9;9(16):18212–23. doi: 10.1021/acsomega.3c10399 (PMC11044158; doi:10.1021/acsomega.3c10399), 2024-04-09
Supplement: ao3c10399_si_001.pdf [file ao3c10399_si_001.pdf]

## Supporting Information

### **Metabolic profiling in plasma and brain induced by 17 $\beta$ -estradiol supplementation in ovariectomized mice**

So Hwi Yang <sup>a,1</sup>, Ye Jin Kim <sup>a,1</sup>, Hye Rim Yang <sup>a</sup>, Sang Un Park <sup>b</sup>, Jae Geun kim <sup>a,\*</sup>, and Jae Kwang Kim<sup>a,c,\*</sup>

<sup>a</sup>Division of Life Sciences, College of Life Sciences, and Bioengineering, Incheon National University, Incheon 22012, Republic of Korea

<sup>b</sup> Department of Crop Science, Chungnam National University, 99 Daehak-ro, Yuseong-gu, Daejeon 34134, Republic of Korea

<sup>c</sup> Convergence Research Center for Insect Vectors, Incheon National University, Incheon 22012, Republic of Korea

\*Corresponding author Division of Life Sciences, College of Life Sciences and Bioengineering, Incheon National University, Incheon 22012, Republic of Korea

*E-mail address* kjkpj@inu.ac.kr (J. K. Kim), thgnltkfd12@inu.ac.kr (S. H. Yang), 201721047@inu.ac.kr (Y. J. Kim), jgkim@inu.ac.kr (J. G. Kim), hr.yang0414@gmail.com (H. R. Yang), supark@cnu.ac.kr (S. U. Park)

## (A) Plasma

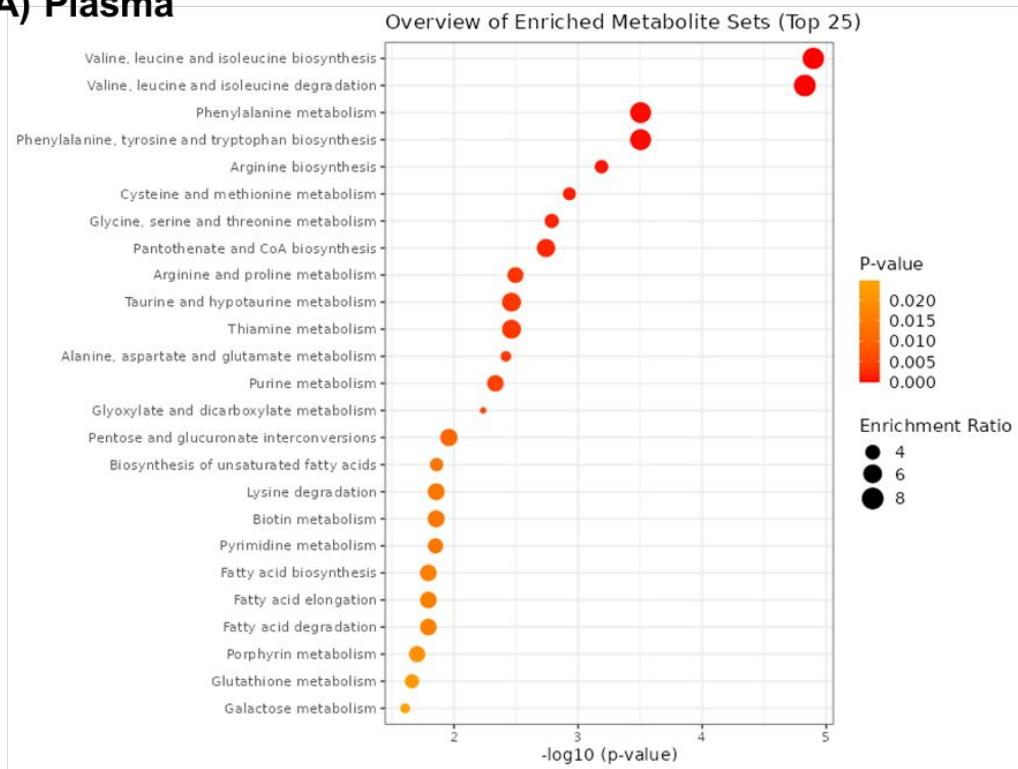

## (B) Brain

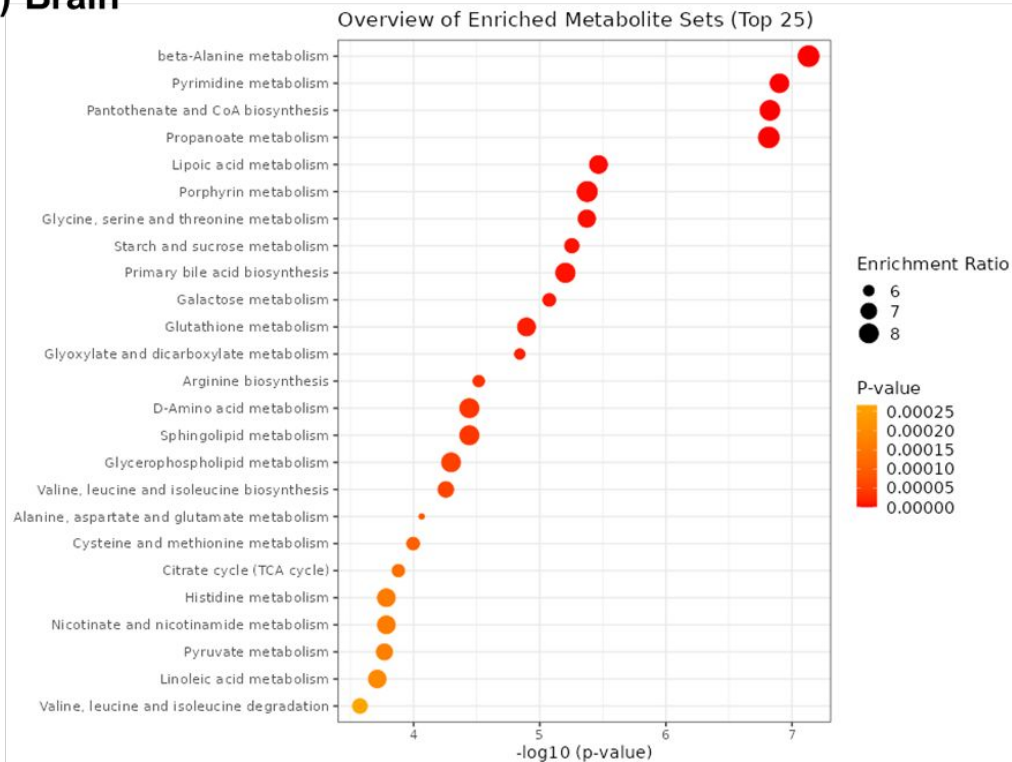

**Figure S1.** Pathway and enrichment analyses of (A) plasma and (B) brain metabolites affected by  $17\beta$ -estradiol supplementation in the OVX mouse model. Pathway analysis was conducted using KEGG human metabolic pathways.
